# Supplementary material
Source: publisher figshare collection journal article supplement (https://acs.figshare.com/ndownloader/files/16460687)
Supplement: Supplementary file 1 [file 16460687]

Archive with 5 entries (5 files):
- info.xml
- ao9b00676_high_quality.mp4
- 1016_Combined_permission_from_photographer.pdf
- 1700_Combined_Model_Release_form.pdf
- ao9b00676.pdf
