# Supplementary material
Source: publisher figshare collection journal article supplement (https://acs.figshare.com/ndownloader/files/16460687)
Supplement: Supplementary file 1 [file 16460687 › 1016_Combined_permission_from_photographer.pdf]

# Permission Request Form for Use of *Individual and/or Group Photos* in *ACS LiveSlides* from Copyright Owners/Publishers/Photographers Other Than ACS

Date: 25 June 2019

**To:** Publisher's/Copyright Owner's Contact Information  
Bimlesh Lochab, Department of Chemistry,  
Shiv Nadar University  
Ph no. 0091-9899915584  
India, Gautam Buddha Nagar, Uttar Pradesh  
201314  
Your Phone Number Including Country and City  
Codes  
bimlesh.lochab@snu.edu.in

**From:** \_\_\_\_\_  
Your Name and Complete Mailing Address  
Bimlesh Lochab, Department of Chemistry,  
Shiv Nadar University  
Ph no. 0091-9899915584  
India, Gautam Buddha Nagar, Uttar Pradesh  
201314  
Your Phone Number Including Country and City  
Codes  
bimlesh.lochab@snu.edu.in  
Your Email Address \_\_\_\_\_  
Your Specific Deadline Date \_\_\_\_\_

I am preparing an *ACS LiveSlides* entitled:

Control of Functionalities in GO: Effect of Brönsted acids as Supported by Ab-initio Simulations and Experiments

to appear with Control of Functionalities in GO: Effect of Brönsted acids as Supported by Ab-initio Simulations and Experiments and <https://doi.org/10.1021/acsomega.9b00676>

Title of ACS Publication and DOI

which is published by the American Chemical Society, a not-for-profit membership society and a STM signatory.

I would appreciate your permission to use the following material in all formats including but not limited to print, microform, electronic, and/or CD-ROM from the following reference:

**Individual Photographs of the Following Individuals:** The image of Dr. Nisha Yadav was clicked by Dr. Bimlesh Lochab

Not applicable  
**Collective Photograph (s) representing the following groups:** \_\_\_\_\_

If you, the photographer, have a required **credit line**, please include it below:

For your convenience, you may sign and date the bottom of this letter to indicate your agreement. Please return this form to me at the above email address, by the above **deadline date** (if given above). Thank you.

**Agreed:**

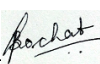  
\_\_\_\_\_  
Publisher's/Copyright Owner's Signature or Stamp

**Date:**

25 June 2019

Date

**SIGN HERE**

Submit completed and signed form with your signed *ACS LiveSlides* Video Release.

7/25/16

# Permission Request Form for Use of *Individual and/or Group Photos* in *ACS LiveSlides* from Copyright Owners/Publishers/Photographers Other Than ACS

Date: 25 June 2019

**To:** Publisher's/Copyright Owner's Contact Information  
Bimlesh Lochab, Department of Chemistry,  
Shiv Nadar University  
Ph no. 0091-9899915584  
India, Gautam Buddha Nagar, Uttar Pradesh  
201314  
Your Phone Number Including Country and City  
Codes  
bimlesh.lochab@snu.edu.in

**From:** \_\_\_\_\_  
Your Name and Complete Mailing Address  
Bimlesh Lochab, Department of Chemistry,  
Shiv Nadar University  
Ph no. 0091-9899915584  
India, Gautam Buddha Nagar, Uttar Pradesh  
201314  
Your Phone Number Including Country and City  
Codes  
bimlesh.lochab@snu.edu.in  
Your Email Address \_\_\_\_\_  
Your Specific Deadline Date \_\_\_\_\_

I am preparing an *ACS LiveSlides* entitled:

Control of Functionalities in GO: Effect of Brönsted acids as Supported by Ab-initio Simulations and Experiments

to appear with Control of Functionalities in GO: Effect of Brönsted acids as Supported by Ab-initio Simulations and Experiments and <https://doi.org/10.1021/acsomega.9b00676>

Title of ACS Publication and DOI

which is published by the American Chemical Society, a not-for-profit membership society and a STM signatory.

I would appreciate your permission to use the following material in all formats including but not limited to print, microform, electronic, and/or CD-ROM from the following reference:

**Individual Photographs of the Following Individuals:** The image of Dr. Priya Johari was clicked by Dr. Bimlesh Lochab

Not applicable  
**Collective Photograph (s) representing the following groups:** \_\_\_\_\_

If you, the photographer, have a required **credit line**, please include it below:

For your convenience, you may sign and date the bottom of this letter to indicate your agreement. Please return this form to me at the above email address, by the above **deadline date** (if given above). Thank you.

**Agreed:**

  
Publisher's/Copyright Owner's Signature or Stamp

**Date:**

25 June 2019

Date

**SIGN HERE**

Submit completed and signed form with your signed *ACS LiveSlides* Video Release.

7/25/16

# Permission Request Form for Use of *Individual and/or Group Photos* in *ACS LiveSlides* from Copyright Owners/Publishers/Photographers Other Than ACS

Date: 25 June 2019

Publisher's/Copyright Owner's Contact Information

**To:** Bimlesh Lochab, Department of Chemistry,  
Shiv Nadar University  
Ph no. 0091-9899915584  
India, Gautam Buddha Nagar, Uttar Pradesh  
201314  
Your Phone Number Including Country and City  
Codes  
bimlesh.lochab@snu.edu.in

**From:**

Your Name and Complete Mailing Address  
Bimlesh Lochab, Department of Chemistry,  
Shiv Nadar University  
Ph no. 0091-9899915584  
India, Gautam Buddha Nagar, Uttar Pradesh  
201314  
Your Phone Number Including Country and City  
Codes  
bimlesh.lochab@snu.edu.in  
Your Email Address  
Your Specific Deadline Date

I am preparing an *ACS LiveSlides* entitled:

Control of Functionalities in GO: Effect of Brönsted acids as Supported by Ab-initio Simulations and Experiments

to appear with Control of Functionalities in GO: Effect of Brönsted acids as Supported by Ab-initio Simulations and Experiments and <https://doi.org/10.1021/acsomega.9b00676>

Title of ACS Publication and DOI

which is published by the American Chemical Society, a not-for-profit membership society and a STM signatory.

I would appreciate your permission to use the following material in all formats including but not limited to print, microform, electronic, and/or CD-ROM from the following reference:

**Individual Photographs of the Following Individuals:** The image of Mr. Dwaipayan Chakraborty was clicked by Dr. Bimlesh Lochab

Not applicable  
**Collective Photograph (s) representing the following groups:**

If you, the photographer, have a required **credit line**, please include it below:

For your convenience, you may sign and date the bottom of this letter to indicate your agreement. Please return this form to me at the above email address, by the above **deadline date** (if given above). Thank you.

**Agreed:**

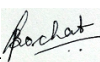  
Publisher's/Copyright Owner's Signature or Stamp

**Date:**

25 June 2019  
Date

**SIGN HERE**

Submit completed and signed form with your signed *ACS LiveSlides* Video Release. 7/25/16

# Permission Request Form for Use of *Individual and/or Group Photos* in *ACS LiveSlides* from Copyright Owners/Publishers/Photographers Other Than ACS

Date: 25 June 2019

**To:** Publisher's/Copyright Owner's Contact Information  
Bimlesh Lochab, Department of Chemistry,  
Shiv Nadar University  
Ph no. 0091-9899915584  
India, Gautam Buddha Nagar, Uttar Pradesh  
201314  
Your Phone Number Including Country and City  
Codes  
bimlesh.lochab@snu.edu.in

**From:** \_\_\_\_\_  
Your Name and Complete Mailing Address  
Bimlesh Lochab, Department of Chemistry,  
Shiv Nadar University  
Ph no. 0091-9899915584  
India, Gautam Buddha Nagar, Uttar Pradesh  
201314  
Your Phone Number Including Country and City  
Codes  
bimlesh.lochab@snu.edu.in  
Your Email Address \_\_\_\_\_  
Your Specific Deadline Date \_\_\_\_\_

I am preparing an *ACS LiveSlides* entitled:

Control of Functionalities in GO: Effect of Brönsted acids as Supported by Ab-initio Simulations and Experiments

to appear with Control of Functionalities in GO: Effect of Brönsted acids as Supported by Ab-initio Simulations and Experiments and <https://doi.org/10.1021/acsomega.9b00676>

Title of ACS Publication and DOI

which is published by the American Chemical Society, a not-for-profit membership society and a STM signatory.

I would appreciate your permission to use the following material in all formats including but not limited to print, microform, electronic, and/or CD-ROM from the following reference:

**Individual Photographs of the Following Individuals:** The image of Ms. Vedha Kallur was clicked by Dr. Bimlesh Lochab

Not applicable  
**Collective Photograph (s) representing the following groups:** \_\_\_\_\_

If you, the photographer, have a required **credit line**, please include it below:

For your convenience, you may sign and date the bottom of this letter to indicate your agreement. Please return this form to me at the above email address, by the above **deadline date** (if given above). Thank you.

**Agreed:**

  
Publisher's/Copyright Owner's Signature or Stamp

**Date:**

25 June 2019

Date

**SIGN HERE**

Submit completed and signed form with your signed *ACS LiveSlides* Video Release.

7/25/16

# Permission Request Form for Use of *Individual and/or Group Photos* in *ACS LiveSlides* from Copyright Owners/Publishers/Photographers Other Than ACS

Date: 25 June 2019

Publisher's/Copyright Owner's Contact Information

Your Name and Complete Mailing Address

**To:** Prof P. Johari Department of Physics,  
Shiv Nadar University  
Ph no. 0091-9920101349  
India, Gautam Buddha Nagar, Uttar Pradesh 201314  
Your Phone Number Including Country and City Codes  
Priya Johari <priya.johari@snu.edu.in>

**From:** Bimlesh Lochab, Department of Chemistry,  
Shiv Nadar University  
Ph no. 0091-9899915584  
India, Gautam Buddha Nagar, Uttar Pradesh  
201314  
Your Phone Number Including Country and City  
Codes  
bimlesh.lochab@snu.edu.in  
Your Email Address  
Your Specific Deadline Date

I am preparing an *ACS LiveSlides* entitled:

Control of Functionalities in GO: Effect of Brönsted acids as Supported by Ab-initio Simulations and Experiments

to appear with Control of Functionalities in GO: Effect of Brönsted acids as Supported by Ab-initio Simulations and Experiments and <https://doi.org/10.1021/acsomega.9b00676>

Title of ACS Publication and DOI

which is published by the American Chemical Society, a not-for-profit membership society and a STM signatory.

I would appreciate your permission to use the following material in all formats including but not limited to print, microform, electronic, and/or CD-ROM from the following reference:

**Individual Photographs of the Following Individuals:** The image of Dr. Bimlesh Lochab was clicked by Prof. Priya Johari

Not applicable  
**Collective Photograph (s) representing the following groups:**

If you, the photographer, have a required **credit line**, please include it below:

For your convenience, you may sign and date the bottom of this letter to indicate your agreement. Please return this form to me at the above email address, by the above **deadline date** (if given above). Thank you.

Agreed:

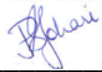  
Publisher's/Copyright Owner's Signature or Stamp

Date:

25 June 2019

Date

**SIGN HERE**

Submit completed and signed form with your signed *ACS LiveSlides* Video Release.

7/25/16
