# Supplementary material
Source: publisher figshare collection journal article supplement (https://acs.figshare.com/ndownloader/files/16460687)
Supplement: Supplementary file 1 [file 16460687 › 1700_Combined_Model_Release_form.pdf]

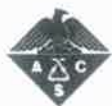

## AMERICAN CHEMICAL SOCIETY

### MODEL RELEASE FORM for ACS LiveSlides (Person in Photograph)

This form cannot be altered. For questions, please contact [ACSPubsMultimedia@acs.org](mailto:ACSPubsMultimedia@acs.org)

#### Requesting Permission:

Date: 26 June 2019

To: Nisha Yadav  
Department of Chemistry, Shiv Nadar University

Return to:  
Bimlesh Lochab,  
Department of Chemistry,  
Shiv Nadar University

I am preparing material for

Control of Functionalities in GO: Effect of Brönsted acids as Supported by Ab-initio Simulations and Experiments DOI: 10.1021/jacs.omega.9b00676

(title of ACS LifeSlide)

to be published by the American Chemical Society, a not-for-profit membership society.

I would like your permission to include the enclosed photograph(s) in which you appear. To indicate your permission, please sign and date the statement below and return this form to me.

I appreciate your prompt response.

Dr. Bimlesh Lochab  
Signed: Bimlesh Lochab  
Grant of Permission:

I hereby grant to the American Chemical Society royalty-free permission, including nonexclusive world rights in all languages, to reproduce in all formats including but not limited to print, microform, electronic, and/or CD-ROM, to reproduce and include my likeness as shown in the attached photocopy(ies) of photograph(s) for the above-mentioned publication.

Agree to and accepted:

Signature Nisha Date: 24/06/19

Check one of the blanks:

☒ I am the person in the photo

☐ I am the authorized agent for the person in the photo (for group photographs, one person, in the photograph, needs to sign on behalf of the group)

Submit completed and signed form with your signed ACS Journals LifeSlides Video Release.

7/19/16

SIGN HERE

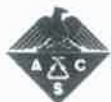

## AMERICAN CHEMICAL SOCIETY

### MODEL RELEASE FORM for ACS LiveSlides (Person in Photograph)

This form cannot be altered. For questions, please contact [ACSPubsMultimedia@acs.org](mailto:ACSPubsMultimedia@acs.org)

#### Requesting Permission:

Date: 26 June 2019

To: Vedha Kallur  
Department of Chemistry, Shiv Nadar University

Return to: Bimlesh Lochab,  
Department of Chemistry,  
Shiv Nadar University

I am preparing material for

Control of Functionalities in GO: Effect of Brönsted acids as Supported by Ab-initio Simulations and Experiments DOI: 10.1021/acs.omega.9b00676

(title of ACS LifeSlide)

to be published by the American Chemical Society, a not-for-profit membership society.

I would like your permission to include the enclosed photograph(s) in which you appear. To indicate your permission, please sign and date the statement below and return this form to me.

I appreciate your prompt response.

Dr. Bimlesh Lochab .....

Signed: [Signature]

Grant of Permission: [Signature]

I hereby grant to the American Chemical Society royalty-free permission, including nonexclusive world rights in all languages, to reproduce in all formats including but not limited to print, microform, electronic, and/or CD-ROM, to reproduce and include my likeness as shown in the attached photocopy(ies) of photograph(s) for the above-mentioned publication.

Agree to and accepted:

**SIGN HERE**

Signature [Signature] Date: 26 June 2019

Check one of the blanks:

☒ I am the person in the photo

☐ I am the authorized agent for the person in the photo (for group photographs, one person, in the photograph, needs to sign on behalf of the group)

Submit completed and signed form with your signed ACS Journals LifeSlides Video Release.

7/19/16

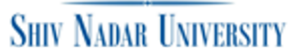

Nisha Yadav &lt;ny345@snu.edu.in&gt;

---

**Fwd: LiveSlides invitation for acsomega.9b00676**

---

**Vedha Kallur** <vk650@snu.edu.in>

Mon, Jun 24, 2019 at 4:10 PM

To: Bimlesh Lochab &lt;bimlesh.lochab@snu.edu.in&gt;

Cc: Nisha Yadav &lt;ny345@snu.edu.in&gt;

Dear ma'am,

Since I'm travelling abroad, I have limited access to email/internet, therefore I authorise Dr. Bimlesh lochab to grant to the American Chemical Society royalty-free permission, including nonexclusive world rights in all languages, to reproduce in all formats including but not limited to print, microform, electronic, and/or CD-ROM, to reproduce and include my likeness as shown in the attached photocopy(ies) of photograph(s) for the above-mentioned publication.

Regards,

Vedha Kallur

[Quoted text hidden]

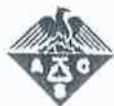

# AMERICAN CHEMICAL SOCIETY

## MODEL RELEASE FORM for ACS LiveSlides (Person in Photograph)

This form cannot be altered. For questions, please contact [ACSPubsMultimedia@acs.org](mailto:ACSPubsMultimedia@acs.org)

Requesting Permission:

Date: 26 June 2019

To: Dwaipayan Chakraborty  
Department of Physics, Shiv Nadar University  
Return to: Bimlesh Lochab,  
Department of Chemistry,  
Shiv Nadar University

I am preparing material for

Control of Functionalities in GO: Effect of Brönsted acids as Supported by Ab-initio Simulations and Experiments DOI: 10.1021/acsomega.9b00676  
(title of ACS LifeSlide)

to be published by the American Chemical Society, a not-for-profit membership society.

I would like your permission to include the enclosed photograph(s) in which you appear. To indicate your permission, please sign and date the statement below and return this form to me.

I appreciate your prompt response.

Dr. Bimlesh Lochab

Signed:

Grant of Permission:

I hereby grant to the American Chemical Society royalty-free permission, including nonexclusive world rights in all languages, to reproduce in all formats including but not limited to print, microform, electronic, and/or CD-ROM, to reproduce and include my likeness as shown in the attached photocopy(ies) of photograph(s) for the above-mentioned publication.

Agree to and accepted:

SIGN HERE

Signature

Date:

24.06.2019

Check one of the blanks:

☒ I am the person in the photo

☐ I am the authorized agent for the person in the photo (for group photographs, one person, in the photograph, needs to sign on behalf of the group)

Submit completed and signed form with your signed ACS Journals LifeSlides Video Release.

7/19/16

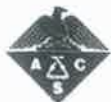

## AMERICAN CHEMICAL SOCIETY

### MODEL RELEASE FORM for ACS LiveSlides (Person in Photograph)

This form cannot be altered. For questions, please contact [ACSPubsMultimedia@acs.org](mailto:ACSPubsMultimedia@acs.org)

#### Requesting Permission:

Date: 26 June 2019

To: Priya Johari, Department  
Physics, Shiv Nadar University

of Return to:  
Bimlesh Lochab,  
Department of Chemistry,  
Shiv Nadar University

I am preparing material for

Control of Functionalities in GO: Effect of Brönsted acids as Supported by Ab-initio  
Simulations and Experiments DOI: 10.1021/acsomega.9b00676

(title of ACS LifeSlide)

to be published by the American Chemical Society, a not-for-profit membership society.

I would like your permission to include the enclosed photograph(s) in which you appear. To indicate your permission, please sign and date the statement below and return this form to me.

I appreciate your prompt response.

Dr. Bimlesh Lochab .....

Signed: Bimlesh Lochab

Grant of Permission: Bimlesh Lochab

I hereby grant to the American Chemical Society royalty-free permission, including nonexclusive world rights in all languages, to reproduce in all formats including but not limited to print, microform, electronic, and/or CD-ROM, to reproduce and include my likeness as shown in the attached photocopy(ies) of photograph(s) for the above-mentioned publication.

Agree to and accepted:

Signature Priya Johari Date: \_\_\_\_\_

Check one of the blanks:

☒ I am the person in the photo

☐ I am the authorized agent for the person in the photo (for group photographs, one person, in the photograph, needs to sign on behalf of the group)

Submit completed and signed form with your signed ACS Journals LifeSlides Video Release.

7/19/16

SIGN HERE

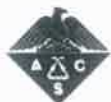

## AMERICAN CHEMICAL SOCIETY

### MODEL RELEASE FORM for ACS LiveSlides (Person in Photograph)

This form cannot be altered. For questions, please contact [ACSPubsMultimedia@acs.org](mailto:ACSPubsMultimedia@acs.org)

#### Requesting Permission:

Date: 26 June 2019

To: Bimlesh Lochab,  
Department of Chemistry, Shiv Nadar  
University

of Return to:  
Bimlesh Lochab,  
Department of Chemistry,  
Shiv Nadar University

I am preparing material for

Control of Functionalities in GO: Effect of Brönsted acids as Supported by Ab-initio  
Simulations and Experiments\_ DOI: 10.1021/acsomega.9b00676

(title of ACS LifeSlide)

to be published by the American Chemical Society, a not-for-profit membership society.

I would like your permission to include the enclosed photograph(s) in which you appear. To indicate your permission, please sign and date the statement below and return this form to me.

I appreciate your prompt response.

Dr. Bimlesh Lochab .....

Signed: Bimlesh Lochab

Grant of Permission:

I hereby grant to the American Chemical Society royalty-free permission, including nonexclusive world rights in all languages, to reproduce in all formats including but not limited to print, microform, electronic, and/or CD-ROM, to reproduce and include my likeness as shown in the attached photocopy(ies) of photograph(s) for the above-mentioned publication.

Agree to and accepted:

**SIGN HERE**

Signature Bimlesh Lochab Date: 26/June/2019

Check one of the blanks:

☒ I am the person in the photo

☐ I am the authorized agent for the person in the photo (for group photographs, one person, in the photograph, needs to sign on behalf of the group)

Submit completed and signed form with your signed ACS Journals LifeSlides Video Release.

7/19/16
