# Supplementary material
Source: publisher figshare collection journal article supplement (https://acs.figshare.com/ndownloader/files/16460687)
Supplement: Supplementary file 1 [file 16460687 › info.xml]

<presentation>
	<article>
		<title>Control of Functionalities in GO: Effect of Bronsted acids as Supported by Ab-initio Simulations and Experiments</title>
		<doi>10.1021/acsomega.9b00676</doi>
		<copyright>American Chemical Society</copyright>
		<narrator>Bimlesh Lochab, Nisha Yadav</narrator>
		<contact>Bimlesh Lochab</contact>
		<contact-email>bimlesh.lochab@snu.edu.in</contact-email>
		<author-list>
			<author>Bimlesh Lochab</author>
		</author-list>
	</article>
	<slides height-width-ratio=".75">
		<slide audio-time="54">
			<subtitle/>
		</slide>
		<slide audio-time="92">
			<subtitle/>
		</slide>
		<slide audio-time="75">
			<subtitle/>
		</slide>
		<slide audio-time="61">
			<subtitle/>
		</slide>
		<slide audio-time="126">
			<subtitle/>
		</slide>
		<slide audio-time="115">
			<subtitle/>
		</slide>
		<slide audio-time="77">
			<subtitle/>
		</slide>
		<slide audio-time="69">
			<subtitle/>
		</slide>
	</slides>
	<audio duration="669"/>
</presentation>
